# Supplementary figures and images for: The shared genetic landscape of polycystic ovary syndrome and breast cancer: convergence on ER + breast cancer but not ER- breast cancer
Source: PubMed Central journal article supplement — Breast Cancer Res. 2024 Nov 25;26:161. doi: 10.1186/s13058-024-01923-5 (PMC11587662; doi:10.1186/s13058-024-01923-5), 2024-11-25

A

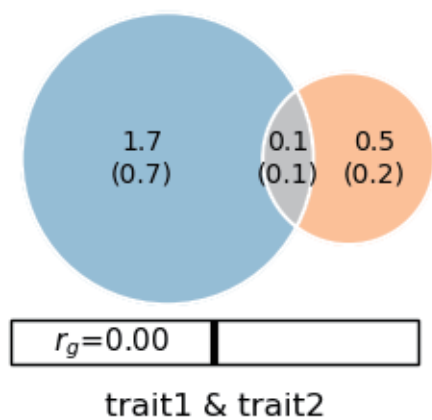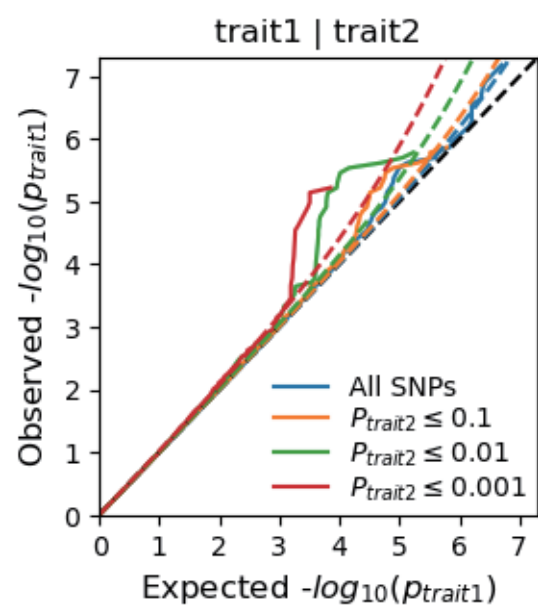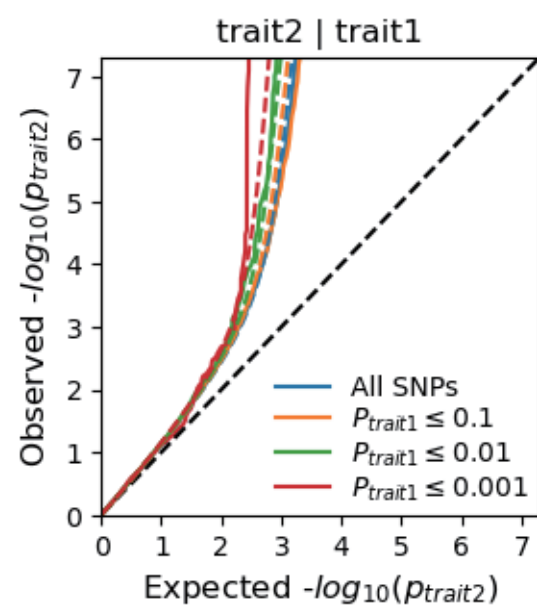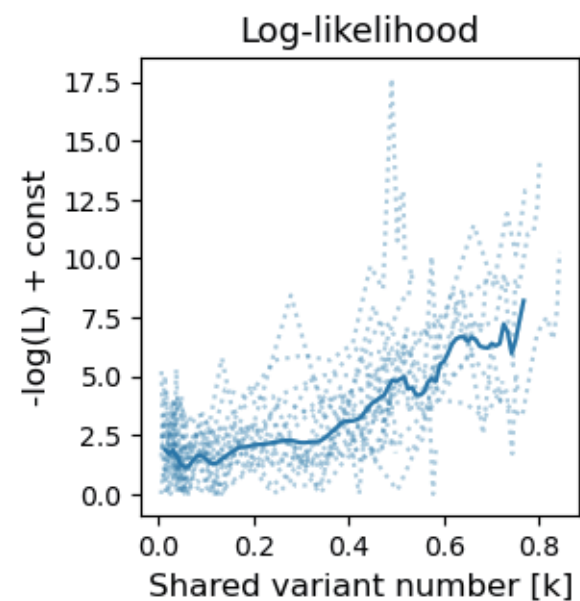

B

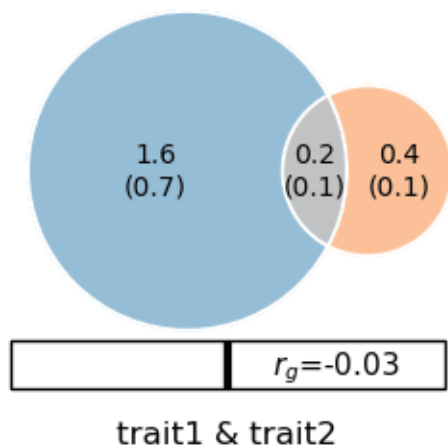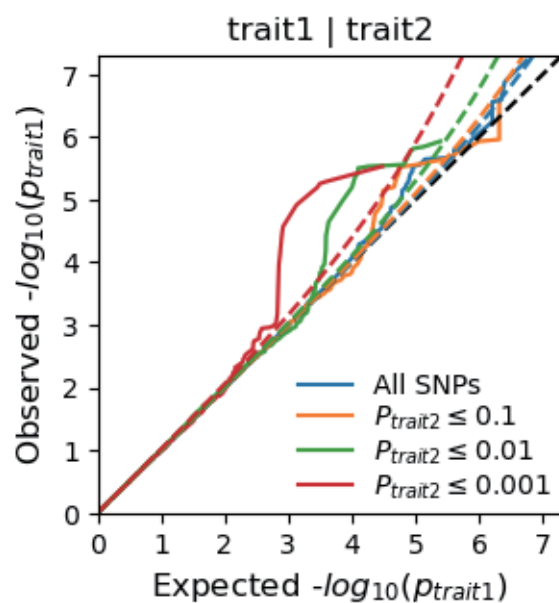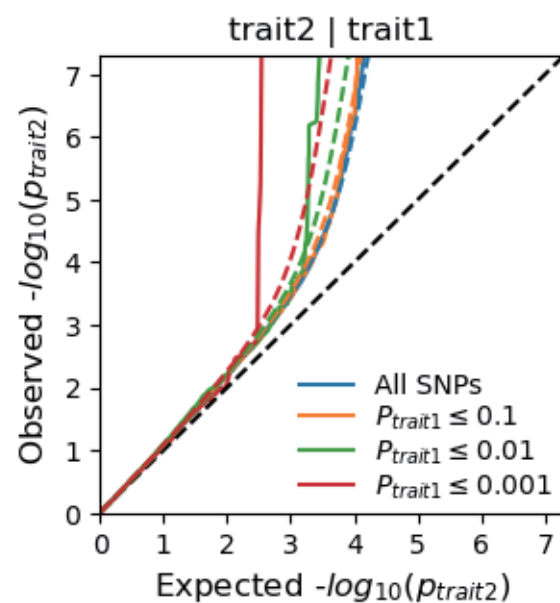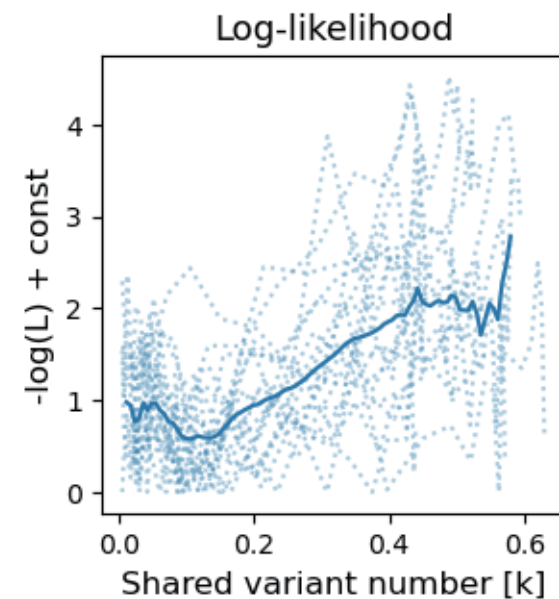

C

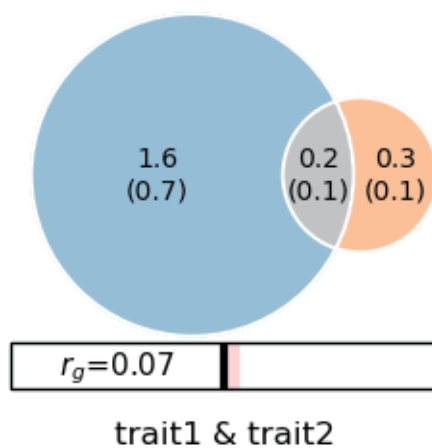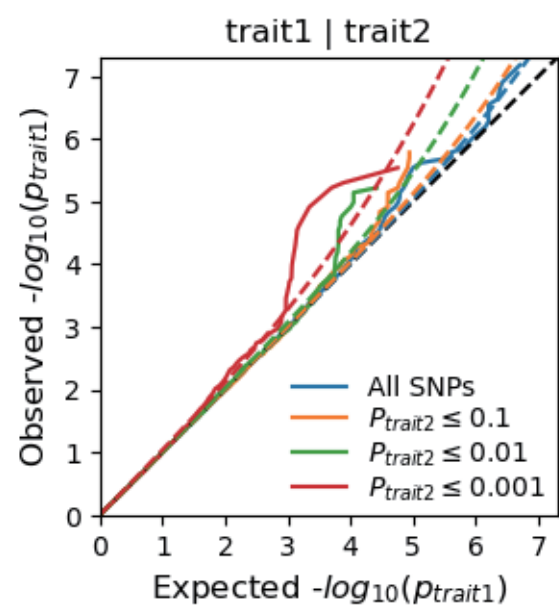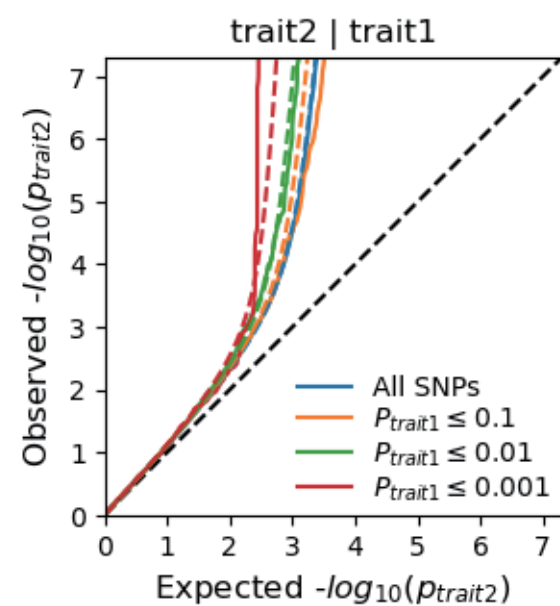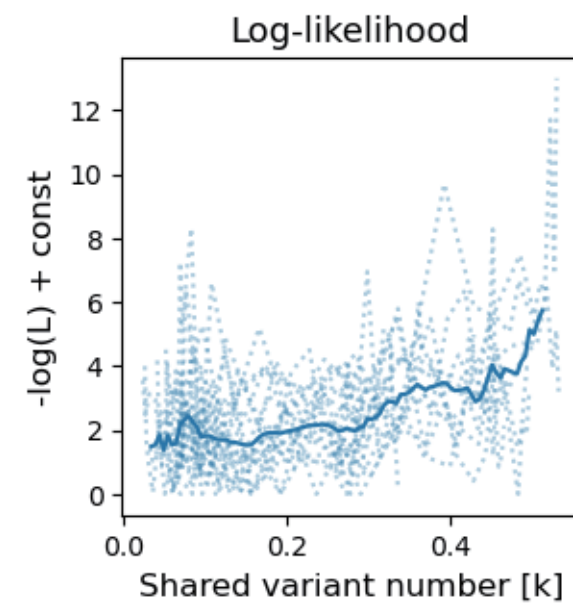

Supplement: 13058_2024_1923_MOESM2_ESM.pdf [file 13058_2024_1923_MOESM2_ESM.pdf]
